# Supplementary material
Source: PubMed Central journal article supplement (PMC1129121)

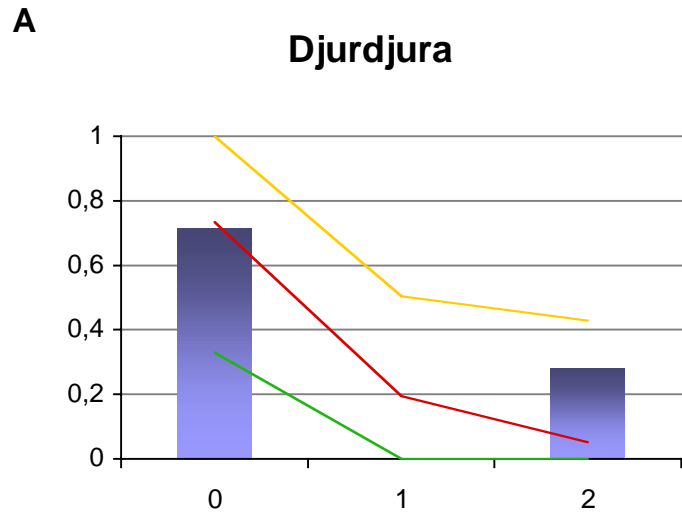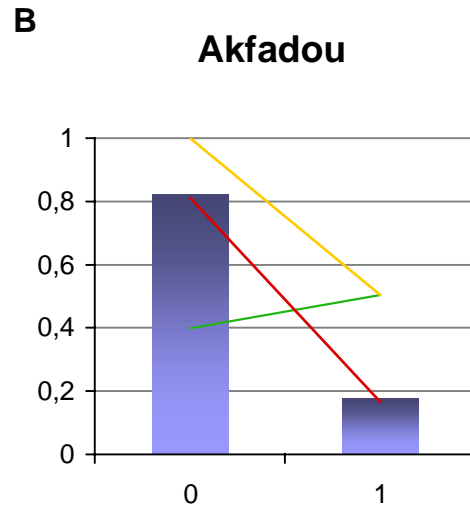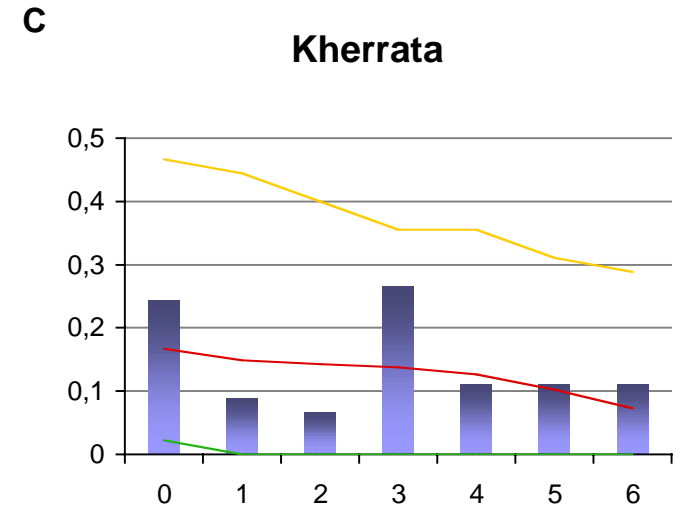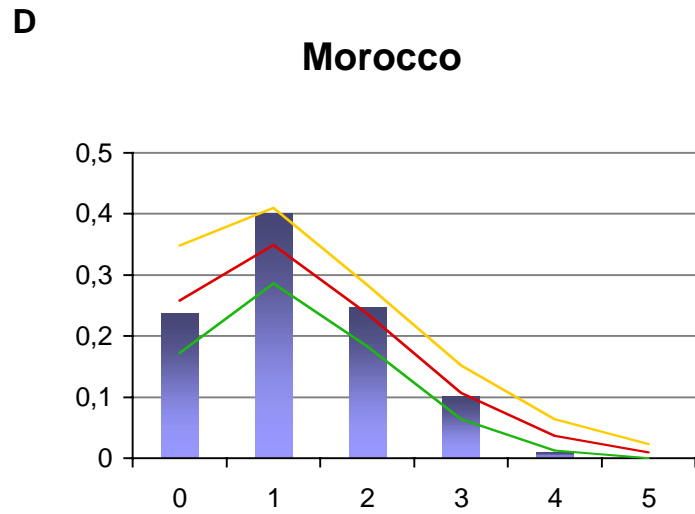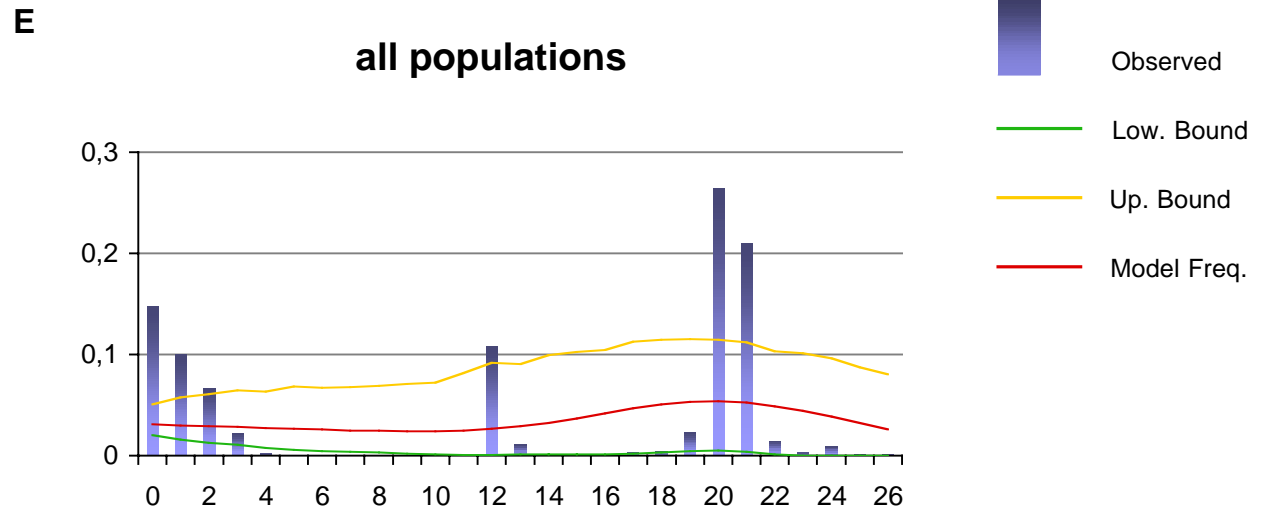

Supplement: pnas_0502186102_1.pdf [file pnas_0502186102_1.pdf]
